# Supplementary material for: A dual functional Cu( ii )-coordination polymer and its rGO composite for selective solvent detection and high performance energy storage
Source: Royal Society of Chemistry journal article supplement (doi:10.1039/d4ma00762j), 2024-01-01
Supplement: d4ma00762j1.pdf [file d4ma00762j1.pdf]

## Dual Functional Cu(II)-CP and its rGO Composite for Selective Solvents Detection and High Performance Energy Storage

Basree,<sup>a§</sup> Waris,<sup>bc</sup> Arif Ali,<sup>d§</sup> Nishat Khan,<sup>a</sup> Mohammad Zain Khan,<sup>c</sup> Ganesh Chandra Nayak,<sup>d</sup>  
Kafeel Ahmad Siddiqui,<sup>e\*</sup> Musheer Ahmad<sup>a\*</sup>

**Affiliation:** <sup>a</sup>Department of Applied Chemistry, ZHCET, Faculty of Engineering and Technology,  
Aligarh Muslim University Aligarh, U.P., India 202002

<sup>b</sup>Environmental Research Laboratory, Department of Chemistry, Faculty of Science, Aligarh  
Muslim University Aligarh, U.P. India 202002

<sup>c</sup>Electrochemical Research Laboratory, Department of Industrial Chemistry, Faculty of Science,  
Aligarh Muslim University Aligarh, U.P. India 202002

<sup>d</sup>Department of Chemistry & Chemical Biology, Indian Institute of Technology (ISM),  
Dhanbad-826004, Jharkhand, India

<sup>e</sup>Department of Chemistry, National Institute of Technology Raipur, Great Eastern Road, Raipur,  
Chhattisgarh, India 492010

**Corresponding email:** [amusheer4@gmail.com](mailto:amusheer4@gmail.com); [kasiddiqui.chy@nitrr.ac.in](mailto:kasiddiqui.chy@nitrr.ac.in)

|                                    |                                                                                 |
|------------------------------------|---------------------------------------------------------------------------------|
| <b>CCDC NO.</b>                    | <b>2314704</b>                                                                  |
| Identification code                | CP-1                                                                            |
| Empirical formula                  | C <sub>78</sub> H <sub>94</sub> Cu <sub>2</sub> N <sub>16</sub> O <sub>17</sub> |
| Formula weight                     | 1654.80                                                                         |
| Temperature/K                      | 293(2)                                                                          |
| Crystal system                     | triclinic                                                                       |
| Space group                        | P-1                                                                             |
| a/Å                                | 10.03413(11)                                                                    |
| b/Å                                | 10.81849(13)                                                                    |
| c/Å                                | 21.7385(2)                                                                      |
| α/°                                | 76.2238(10)                                                                     |
| β/°                                | 85.3859(9)                                                                      |
| γ/°                                | 63.0175(12)                                                                     |
| Volume/Å <sup>3</sup>              | 2041.39(5)                                                                      |
| Z                                  | 1                                                                               |
| ρ <sub>calc</sub> /cm <sup>3</sup> | 1.3460                                                                          |
| μ/mm <sup>-1</sup>                 | 0.597                                                                           |
| F(000)                             | 869.1                                                                           |
| Crystal size/mm <sup>3</sup>       | 0.38 × 0.23 × 0.19                                                              |
| Radiation                          | Mo Kα (λ = 0.71073)                                                             |

|                                                  |                                                                    |
|--------------------------------------------------|--------------------------------------------------------------------|
| 2 $\theta$ range for data collection/ $^{\circ}$ | 3.86 to 54.82                                                      |
| Index ranges                                     | $-12 \leq h \leq 12$ , $-13 \leq k \leq 13$ , $-27 \leq l \leq 27$ |
| Reflections collected                            | 61154                                                              |
| Independent reflections                          | 8854 [ $R_{\text{int}} = 0.0351$ , $R_{\text{sigma}} = 0.0280$ ]   |
| Data/restraints/parameters                       | 8854/0/541                                                         |
| Goodness-of-fit on $F^2$                         | 1.032                                                              |
| Final R indexes [ $I \geq 2\sigma(I)$ ]          | $R_1 = 0.0541$ , $wR_2 = 0.1722$                                   |
| Final R indexes [all data]                       | $R_1 = 0.0718$ , $wR_2 = 0.1890$                                   |
| Largest diff. peak/hole / $e \text{ \AA}^{-3}$   | 0.73/-0.50                                                         |

**Table S2 Bond Lengths for CP-1**

| Atom Atom           | Length/ $\text{\AA}$ | Atom Atom | Length/ $\text{\AA}$ |
|---------------------|----------------------|-----------|----------------------|
| Cu1 O2              | 2.080 (2)            | C15 C16   | 1.380 (4)            |
| Cu1 O2 <sup>1</sup> | 2.080 (2)            | C16 C17   | 1.388 (4)            |
| Cu1 N1 <sup>1</sup> | 2.144 (2)            | C16 C19   | 1.507 (4)            |
| Cu1 N1              | 2.144 (2)            | C17 C18   | 1.377 (4)            |
| Cu1 N4              | 2.184 (2)            | C19 C20   | 1.525 (4)            |
| Cu1 N4 <sup>1</sup> | 2.184 (2)            | C20 C21   | 1.544 (4)            |
| Cu2 O1 <sup>2</sup> | 2.083 (2)            | C21 C22   | 1.507 (4)            |
| Cu2 O1              | 2.083 (2)            | C22 C23   | 1.376 (4)            |
| Cu2 N2              | 2.184 (2)            | C22 C26   | 1.375 (4)            |
| Cu2 N2 <sup>2</sup> | 2.184 (2)            | C23 C24   | 1.385 (4)            |
| Cu2 N3 <sup>2</sup> | 2.138 (2)            | C25 C26   | 1.373 (4)            |
| Cu2 N3              | 2.138 (2)            | O3 N7     | 1.214 (6)            |
| N1 C1               | 1.338 (3)            | O4 N7     | 1.172 (5)            |
| N1 C5               | 1.343 (4)            | O5 N7     | 1.191 (5)            |
| N2 C11              | 1.336 (4)            | O6 N8     | 1.200 (4)            |
| N2 C12              | 1.338 (4)            | O7 N8     | 1.214 (4)            |
| N3 C14              | 1.333 (3)            | O8 N8     | 1.236 (5)            |
| N3 C18              | 1.341 (3)            | N5 C27    | 1.339 (5)            |
| N4 C24              | 1.330 (4)            | N5 C31    | 1.315 (5)            |
| N4 C25              | 1.340 (4)            | N6 C37    | 1.324 (5)            |
| C1 C2               | 1.384 (4)            | N6 C38    | 1.326 (5)            |
| C2 C3               | 1.391 (5)            | C27 C28   | 1.382 (5)            |
| C3 C4               | 1.378 (4)            | C28 C29   | 1.372 (5)            |
| C3 C6               | 1.499 (4)            | C29 C30   | 1.385 (5)            |
| C4 C5               | 1.377 (4)            | C29 C32   | 1.501 (4)            |
| C6 C7               | 1.512 (4)            | C30 C31   | 1.402 (5)            |
| C7 C8               | 1.547 (4)            | C32 C33   | 1.527 (5)            |

|     |     |           |     |     |           |
|-----|-----|-----------|-----|-----|-----------|
| C8  | C9  | 1.508 (4) | C33 | C34 | 1.529 (5) |
| C9  | C10 | 1.376 (4) | C34 | C35 | 1.497 (4) |
| C9  | C13 | 1.385 (4) | C35 | C36 | 1.382 (4) |
| C10 | C11 | 1.377 (4) | C35 | C39 | 1.387 (4) |
| C12 | C13 | 1.371 (4) | C36 | C37 | 1.384 (5) |
| C14 | C15 | 1.388 (4) | C38 | C39 | 1.366 (5) |

<sup>1</sup>1-X,1-Y,-Z; <sup>2</sup>-X,1-Y,1-Z

**Table S3 Bond Angles for CP-1**

| Atom            | Atom | Atom            | Angle/°    | Atom | Atom | Atom | Angle/°   |
|-----------------|------|-----------------|------------|------|------|------|-----------|
| O2 <sup>1</sup> | Cu1  | O2              | 180.0      | C9   | C8   | C7   | 111.1 (2) |
| N1 <sup>1</sup> | Cu1  | O2              | 87.24 (10) | C10  | C9   | C8   | 122.5 (3) |
| N1              | Cu1  | O2              | 92.76 (10) | C13  | C9   | C8   | 121.2 (3) |
| N1              | Cu1  | O2 <sup>1</sup> | 87.24 (10) | C13  | C9   | C10  | 116.2 (3) |
| N1 <sup>1</sup> | Cu1  | O2 <sup>1</sup> | 92.76 (10) | C11  | C10  | C9   | 120.1 (3) |
| N1 <sup>1</sup> | Cu1  | N1              | 180.0      | C10  | C11  | N2   | 123.9 (3) |
| N4              | Cu1  | O2 <sup>1</sup> | 89.24 (9)  | C13  | C12  | N2   | 123.7 (3) |
| N4              | Cu1  | O2              | 90.76 (9)  | C12  | C13  | C9   | 120.3 (3) |
| N4 <sup>1</sup> | Cu1  | O2 <sup>1</sup> | 90.76 (9)  | C15  | C14  | N3   | 123.1 (3) |
| N4 <sup>1</sup> | Cu1  | O2              | 89.24 (9)  | C16  | C15  | C14  | 120.1 (3) |
| N4 <sup>1</sup> | Cu1  | N1              | 90.03 (8)  | C17  | C16  | C15  | 116.7 (2) |
| N4 <sup>1</sup> | Cu1  | N1 <sup>1</sup> | 89.97 (8)  | C19  | C16  | C15  | 122.2 (3) |
| N4              | Cu1  | N1              | 89.97 (8)  | C19  | C16  | C17  | 121.0 (3) |
| N4              | Cu1  | N1 <sup>1</sup> | 90.03 (8)  | C18  | C17  | C16  | 119.7 (3) |
| N4 <sup>1</sup> | Cu1  | N4              | 180.0      | C17  | C18  | N3   | 123.7 (3) |
| O1 <sup>2</sup> | Cu2  | O1              | 180.0      | C20  | C19  | C16  | 111.1 (2) |
| N2              | Cu2  | O1              | 89.06 (9)  | C21  | C20  | C19  | 113.2 (2) |
| N2              | Cu2  | O1 <sup>2</sup> | 90.94 (9)  | C22  | C21  | C20  | 111.7 (2) |
| N2 <sup>2</sup> | Cu2  | O1              | 90.94 (9)  | C23  | C22  | C21  | 121.9 (3) |
| N2 <sup>2</sup> | Cu2  | O1 <sup>2</sup> | 89.06 (9)  | C26  | C22  | C21  | 121.9 (3) |
| N2 <sup>2</sup> | Cu2  | N2              | 180.0      | C26  | C22  | C23  | 116.2 (2) |
| N3              | Cu2  | O1 <sup>2</sup> | 91.73 (10) | C24  | C23  | C22  | 119.9 (3) |
| N3 <sup>2</sup> | Cu2  | O1 <sup>2</sup> | 88.27 (10) | C23  | C24  | N4   | 123.7 (3) |
| N3 <sup>2</sup> | Cu2  | O1              | 91.73 (10) | C26  | C25  | N4   | 123.5 (3) |
| N3              | Cu2  | O1              | 88.27 (10) | C25  | C26  | C22  | 120.5 (3) |
| N3 <sup>2</sup> | Cu2  | N2              | 93.15 (8)  | O4   | N7   | O3   | 122.6 (7) |
| N3 <sup>2</sup> | Cu2  | N2 <sup>2</sup> | 86.85 (8)  | O5   | N7   | O3   | 112.5 (5) |
| N3              | Cu2  | N2 <sup>2</sup> | 93.15 (8)  | O5   | N7   | O4   | 124.5 (6) |
| N3              | Cu2  | N2              | 86.85 (8)  | O7   | N8   | O6   | 123.9 (4) |
| N3              | Cu2  | N3 <sup>2</sup> | 180.0      | O8   | N8   | O6   | 118.1 (4) |

|     |    |                  |             |     |     |     |           |
|-----|----|------------------|-------------|-----|-----|-----|-----------|
| C1  | N1 | Cu1 <sup>1</sup> | 125.40 (19) | O8  | N8  | O7  | 117.8 (4) |
| C5  | N1 | Cu1 <sup>1</sup> | 118.27 (17) | C31 | N5  | C27 | 116.7 (3) |
| C5  | N1 | C1               | 116.0 (2)   | C38 | N6  | C37 | 115.8 (3) |
| C11 | N2 | Cu2              | 125.03 (19) | C28 | C27 | N5  | 123.0 (4) |
| C12 | N2 | Cu2              | 117.96 (18) | C29 | C28 | C27 | 120.3 (3) |
| C12 | N2 | C11              | 115.7 (2)   | C30 | C29 | C28 | 117.4 (3) |
| C14 | N3 | Cu2 <sup>2</sup> | 122.17 (18) | C32 | C29 | C28 | 123.4 (3) |
| C18 | N3 | Cu2 <sup>2</sup> | 121.15 (18) | C32 | C29 | C30 | 119.2 (3) |
| C18 | N3 | C14              | 116.7 (2)   | C31 | C30 | C29 | 118.3 (3) |
| C24 | N4 | Cu1              | 120.98 (18) | C30 | C31 | N5  | 124.3 (3) |
| C25 | N4 | Cu1              | 121.91 (19) | C33 | C32 | C29 | 112.1 (3) |
| C25 | N4 | C24              | 115.6 (2)   | C34 | C33 | C32 | 112.6 (3) |
| C2  | C1 | N1               | 123.6 (3)   | C35 | C34 | C33 | 112.9 (3) |
| C3  | C2 | C1               | 119.8 (3)   | C36 | C35 | C34 | 123.4 (3) |
| C4  | C3 | C2               | 116.5 (3)   | C39 | C35 | C34 | 120.5 (3) |
| C6  | C3 | C2               | 122.0 (3)   | C39 | C35 | C36 | 116.1 (3) |
| C6  | C3 | C4               | 121.5 (3)   | C37 | C36 | C35 | 120.1 (3) |
| C5  | C4 | C3               | 120.2 (3)   | C36 | C37 | N6  | 123.5 (3) |
| C4  | C5 | N1               | 123.7 (3)   | C39 | C38 | N6  | 125.0 (3) |
| C7  | C6 | C3               | 113.2 (3)   | C38 | C39 | C35 | 119.4 (3) |
| C8  | C7 | C6               | 112.5 (3)   |     |     |     |           |

<sup>1</sup>1-X,1-Y,-Z; <sup>2</sup>-X,1-Y,1-Z

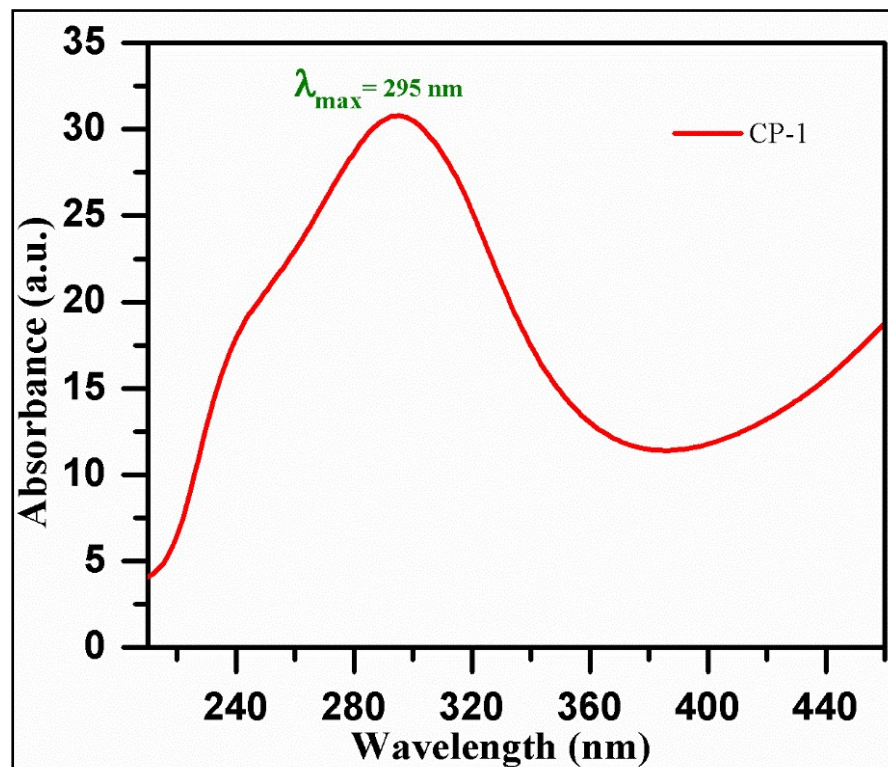

Figure S1. UV-DRS spectrum of CP-1.

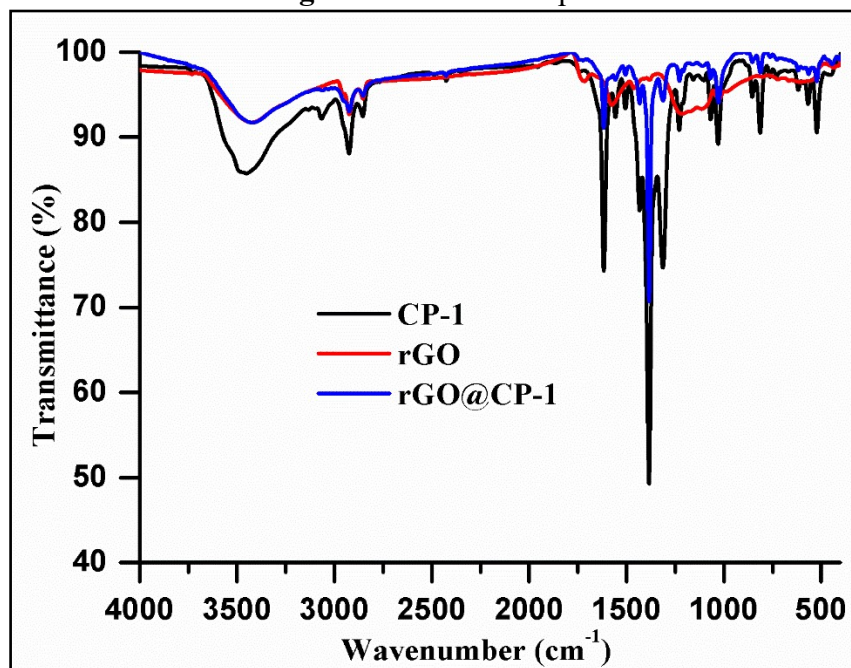

Figure S2. FTIR spectra of CP-1, reduced graphene oxide (rGO), and composite (rGO@CP-1).

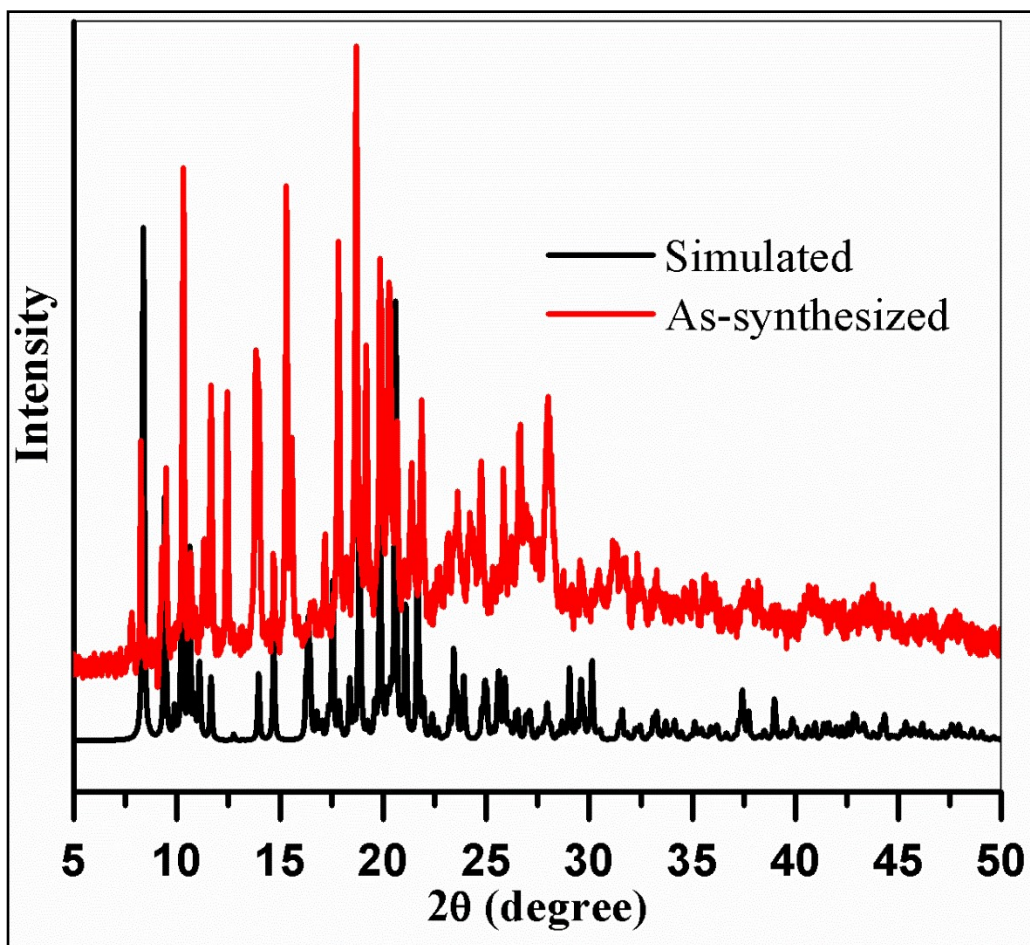

Figure S3(a). PXR D patterns of simulated and as-synthesized of CP-1.

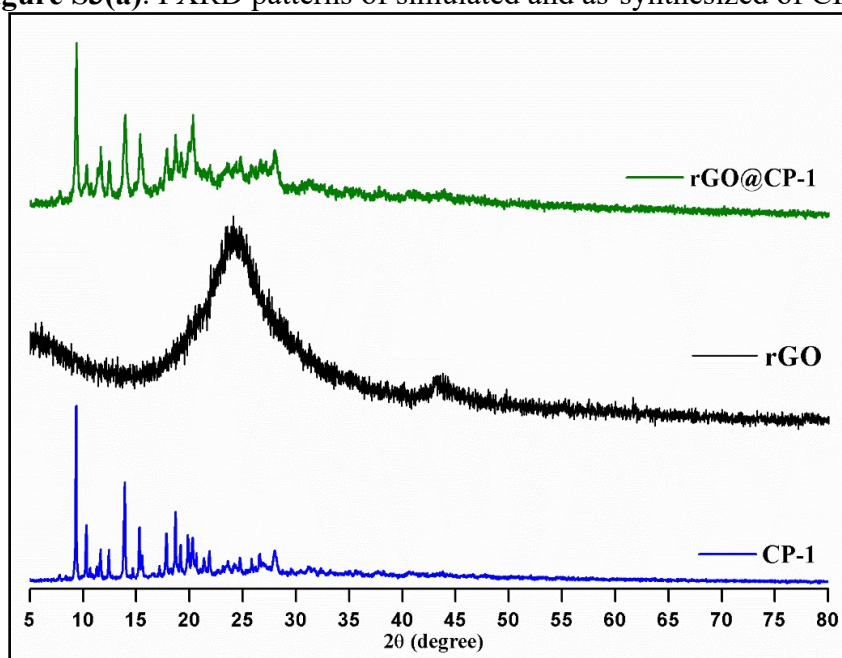

**Figure S3b.** PXRD patterns of as-synthesized CP-1, reduced graphene oxide (rGO), and rGO@CP-1.

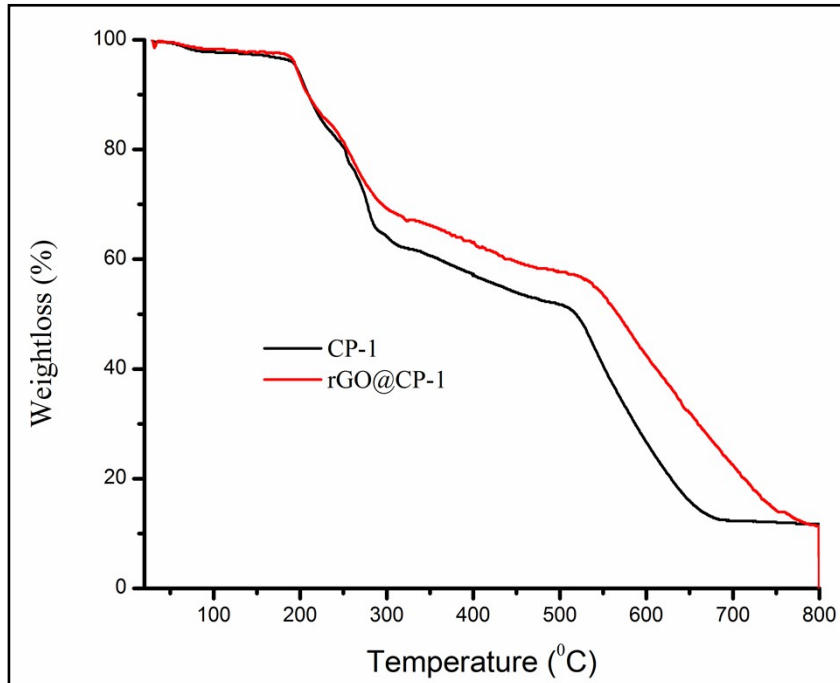

**Figure S4.** Thermogravimetric curves of as-synthesized coordination polymer (CP-1), and composite (rGO@CP-1).

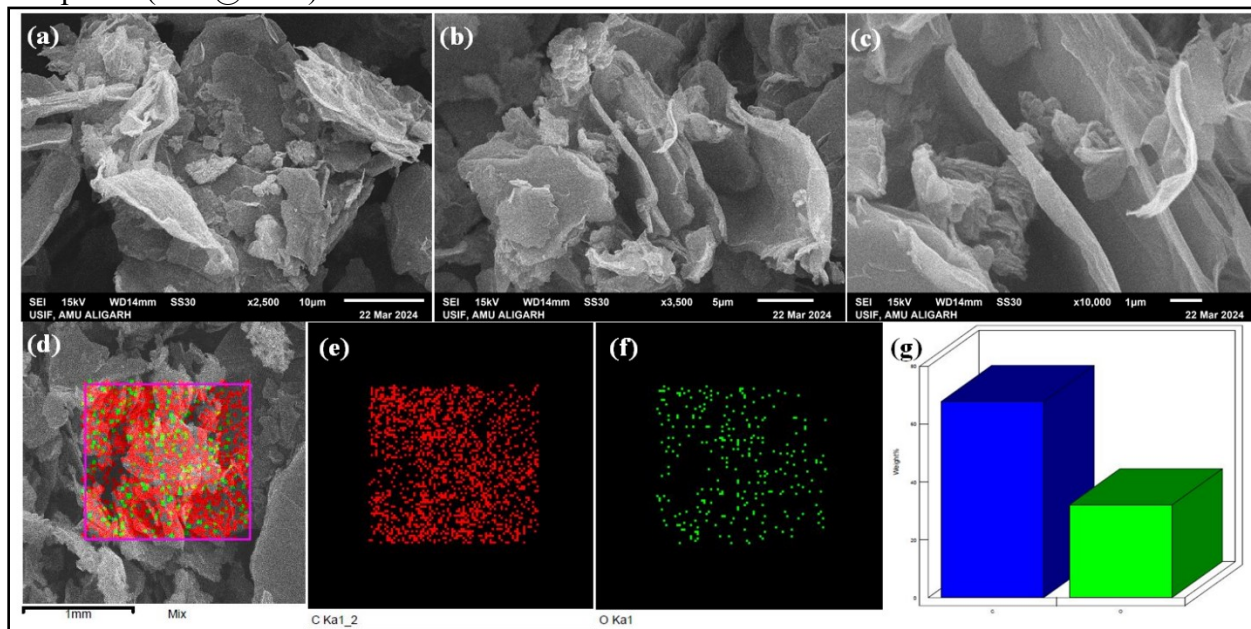

**Figure S5a.** SEM images of reduced graphene oxide at different magnification range (a-c) with mapping at 1mm selective area (d-f) and EDX (g).

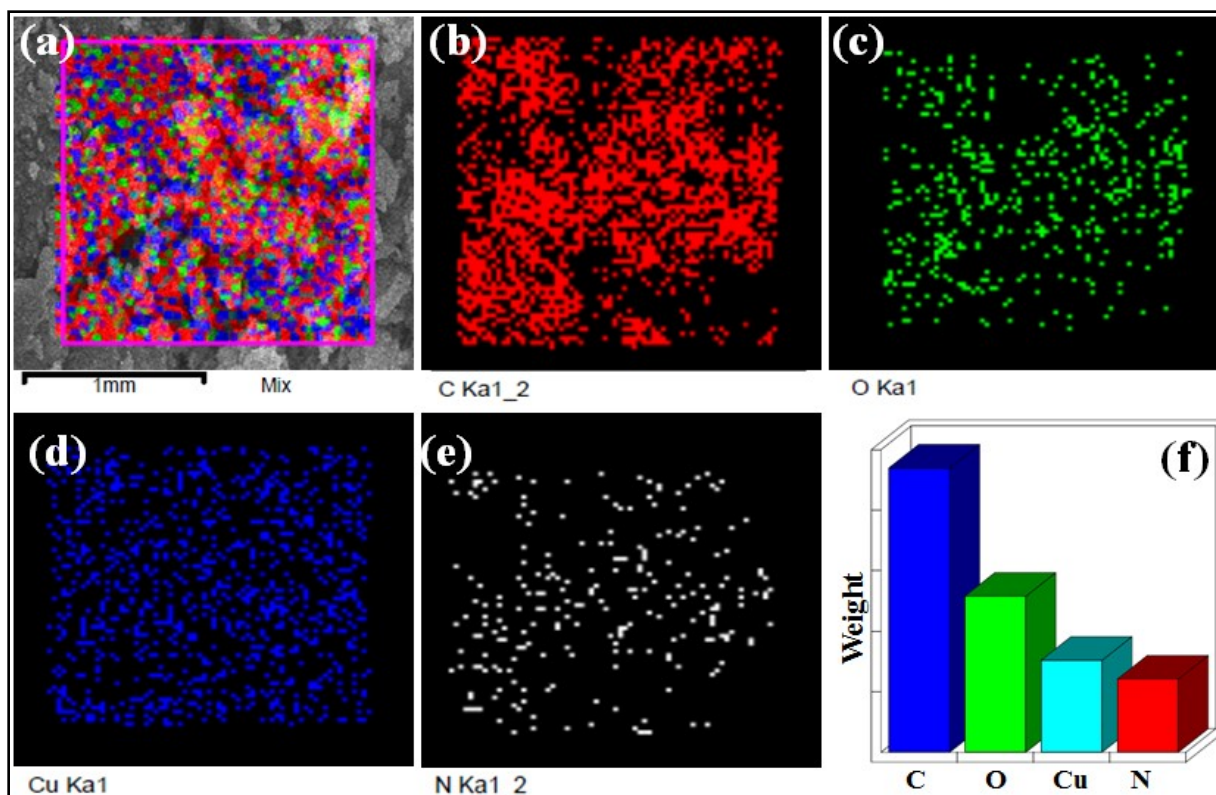

**Figure S5b.** SEM images of rGO@CP-1 on 1mm mixed selective area for elemental mapping (a-e) and EDX (f).

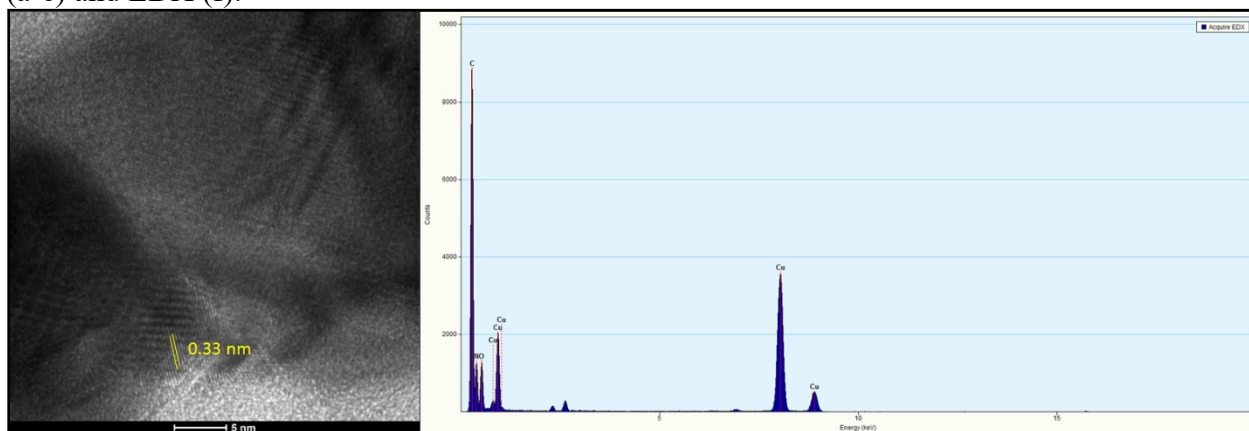

**Figure S5c.** HR-TEM image of rGO@CP-1 for lattice fringes with EDX spectrum.



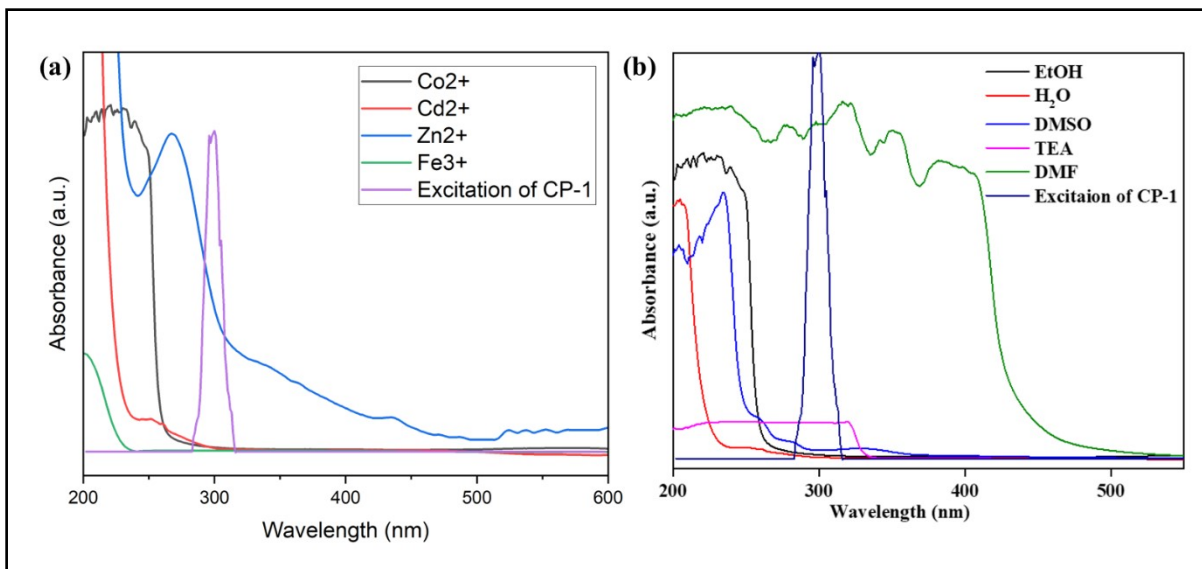

**Figure S6.** Spectral overlap between the UV-Vis absorption spectra of various analytes and the excitation spectra of CP-1.

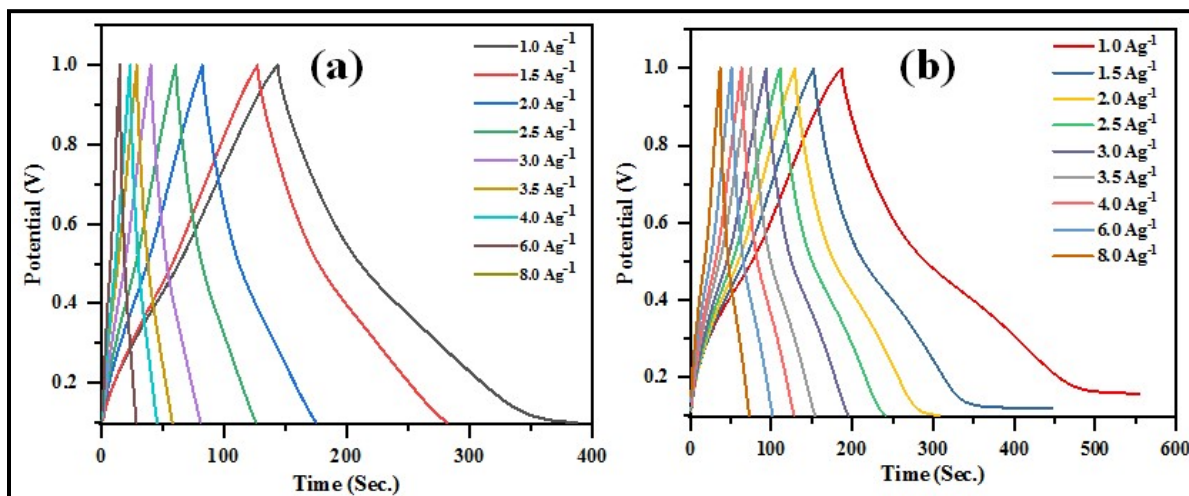

**Figure S7.** GCD curves of (a) CP-1 and (b) rGO sheet.
